# Supplementary material for: Mechanistic insights into endosomal escape by sodium oleate-modified liposomes
Source: publisher site journal article supplement (doi:10.3762/bjnano.15.131), 2024-12-30
Supplement: Additional file 1 [file 2190-4286-15-131-S1.pdf]

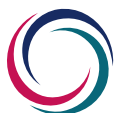

## Supporting Information

for

### **Mechanistic insights into endosomal escape by sodium oleate-modified liposomes**

Ebrahim Sadaqa, Satrialdi, Fransiska Kurniawan and Diky Mudhakar

*Beilstein J. Nanotechnol.* **2024**, *15*, 1667–1685. [doi:10.3762/bjnano.15.131](https://doi.org/10.3762/bjnano.15.131)

## Additional figures

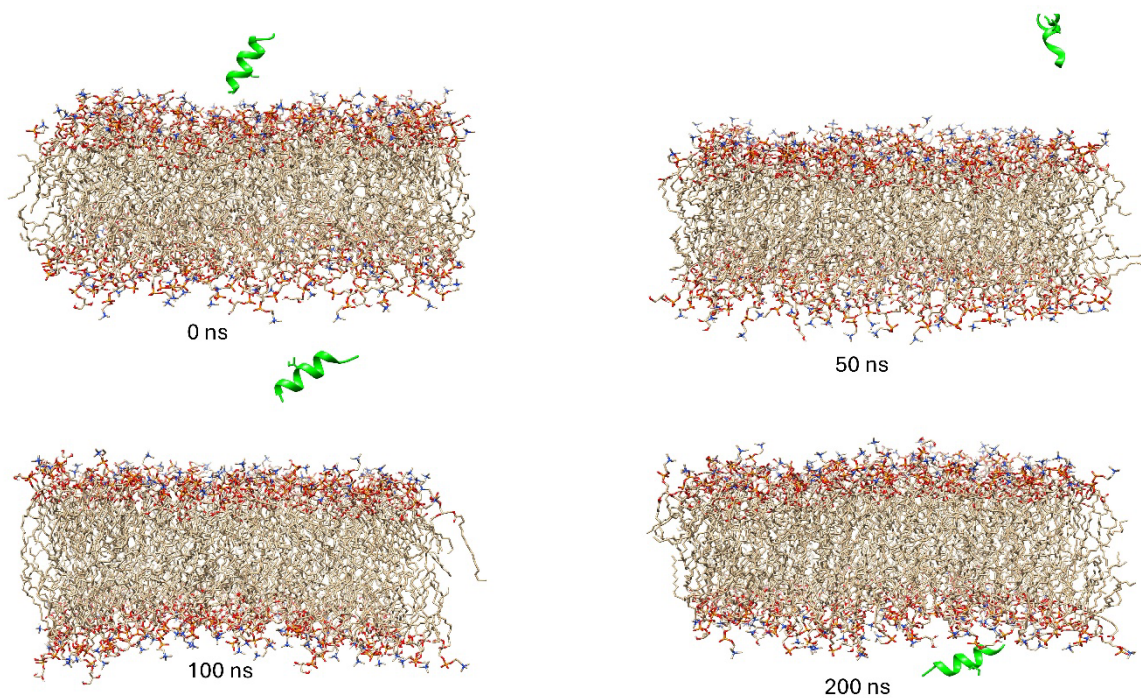

**Figure S1:** MD simulation of the interaction of non-protonated Aurein 1.2 (AUR) peptide with a lipid bilayer. Snapshots show the position of non-protonated AUR relative to the lipid bilayer after 0, 50, 100, and 200 ns.

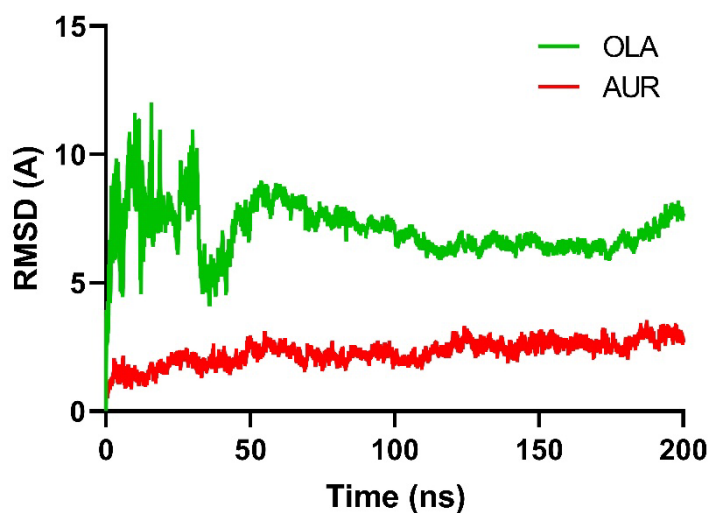

**Figure S2:** RMSD analysis of oleic acid and Aurein 1.2 in lipid bilayers over 200 ns.

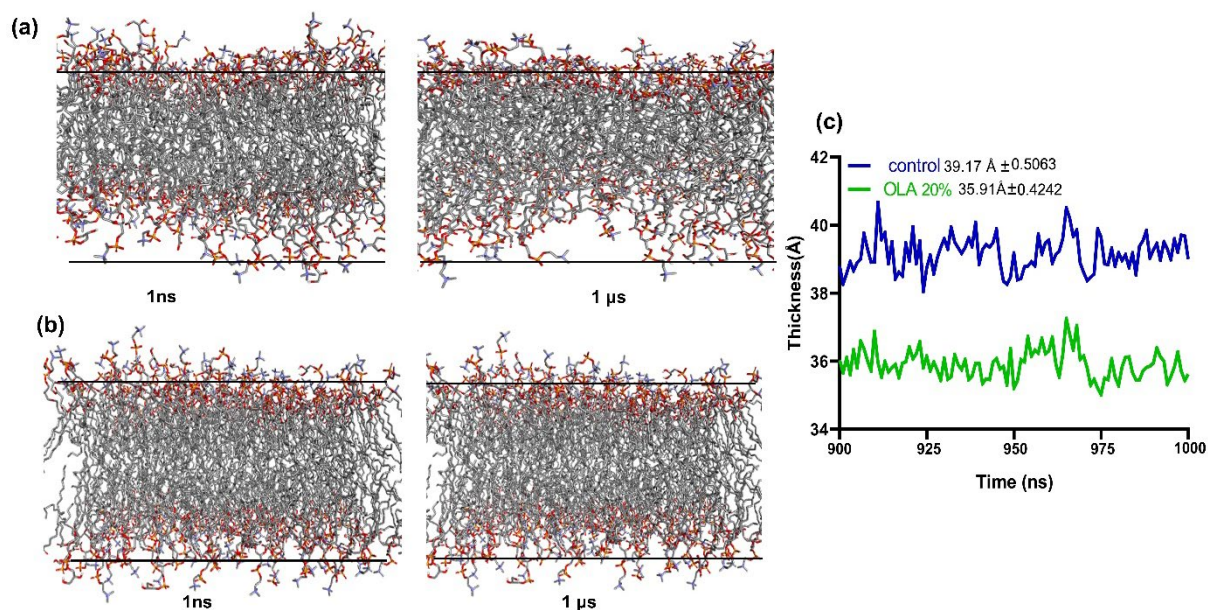

**Figure S3:** Snapshots of membrane systems at 1 ns and 1  $\mu$ s for (a) control and (b) 20% oleic acid (OLA). (c) Membrane thickness over the final 100 ns of a 1  $\mu$ s simulation, showing control (blue) and 20% OLA (green) with respective average thickness values of  $39.17 \pm 0.51$  Å and  $35.91 \pm 0.42$  Å.
